# Supplementary material for: Earlier diagnosis in anorexia nervosa: better watch growth charts!
Source: PubMed Central journal article supplement (PMC7469097; doi:10.1186/s40337-020-00321-4), 2020-09-03

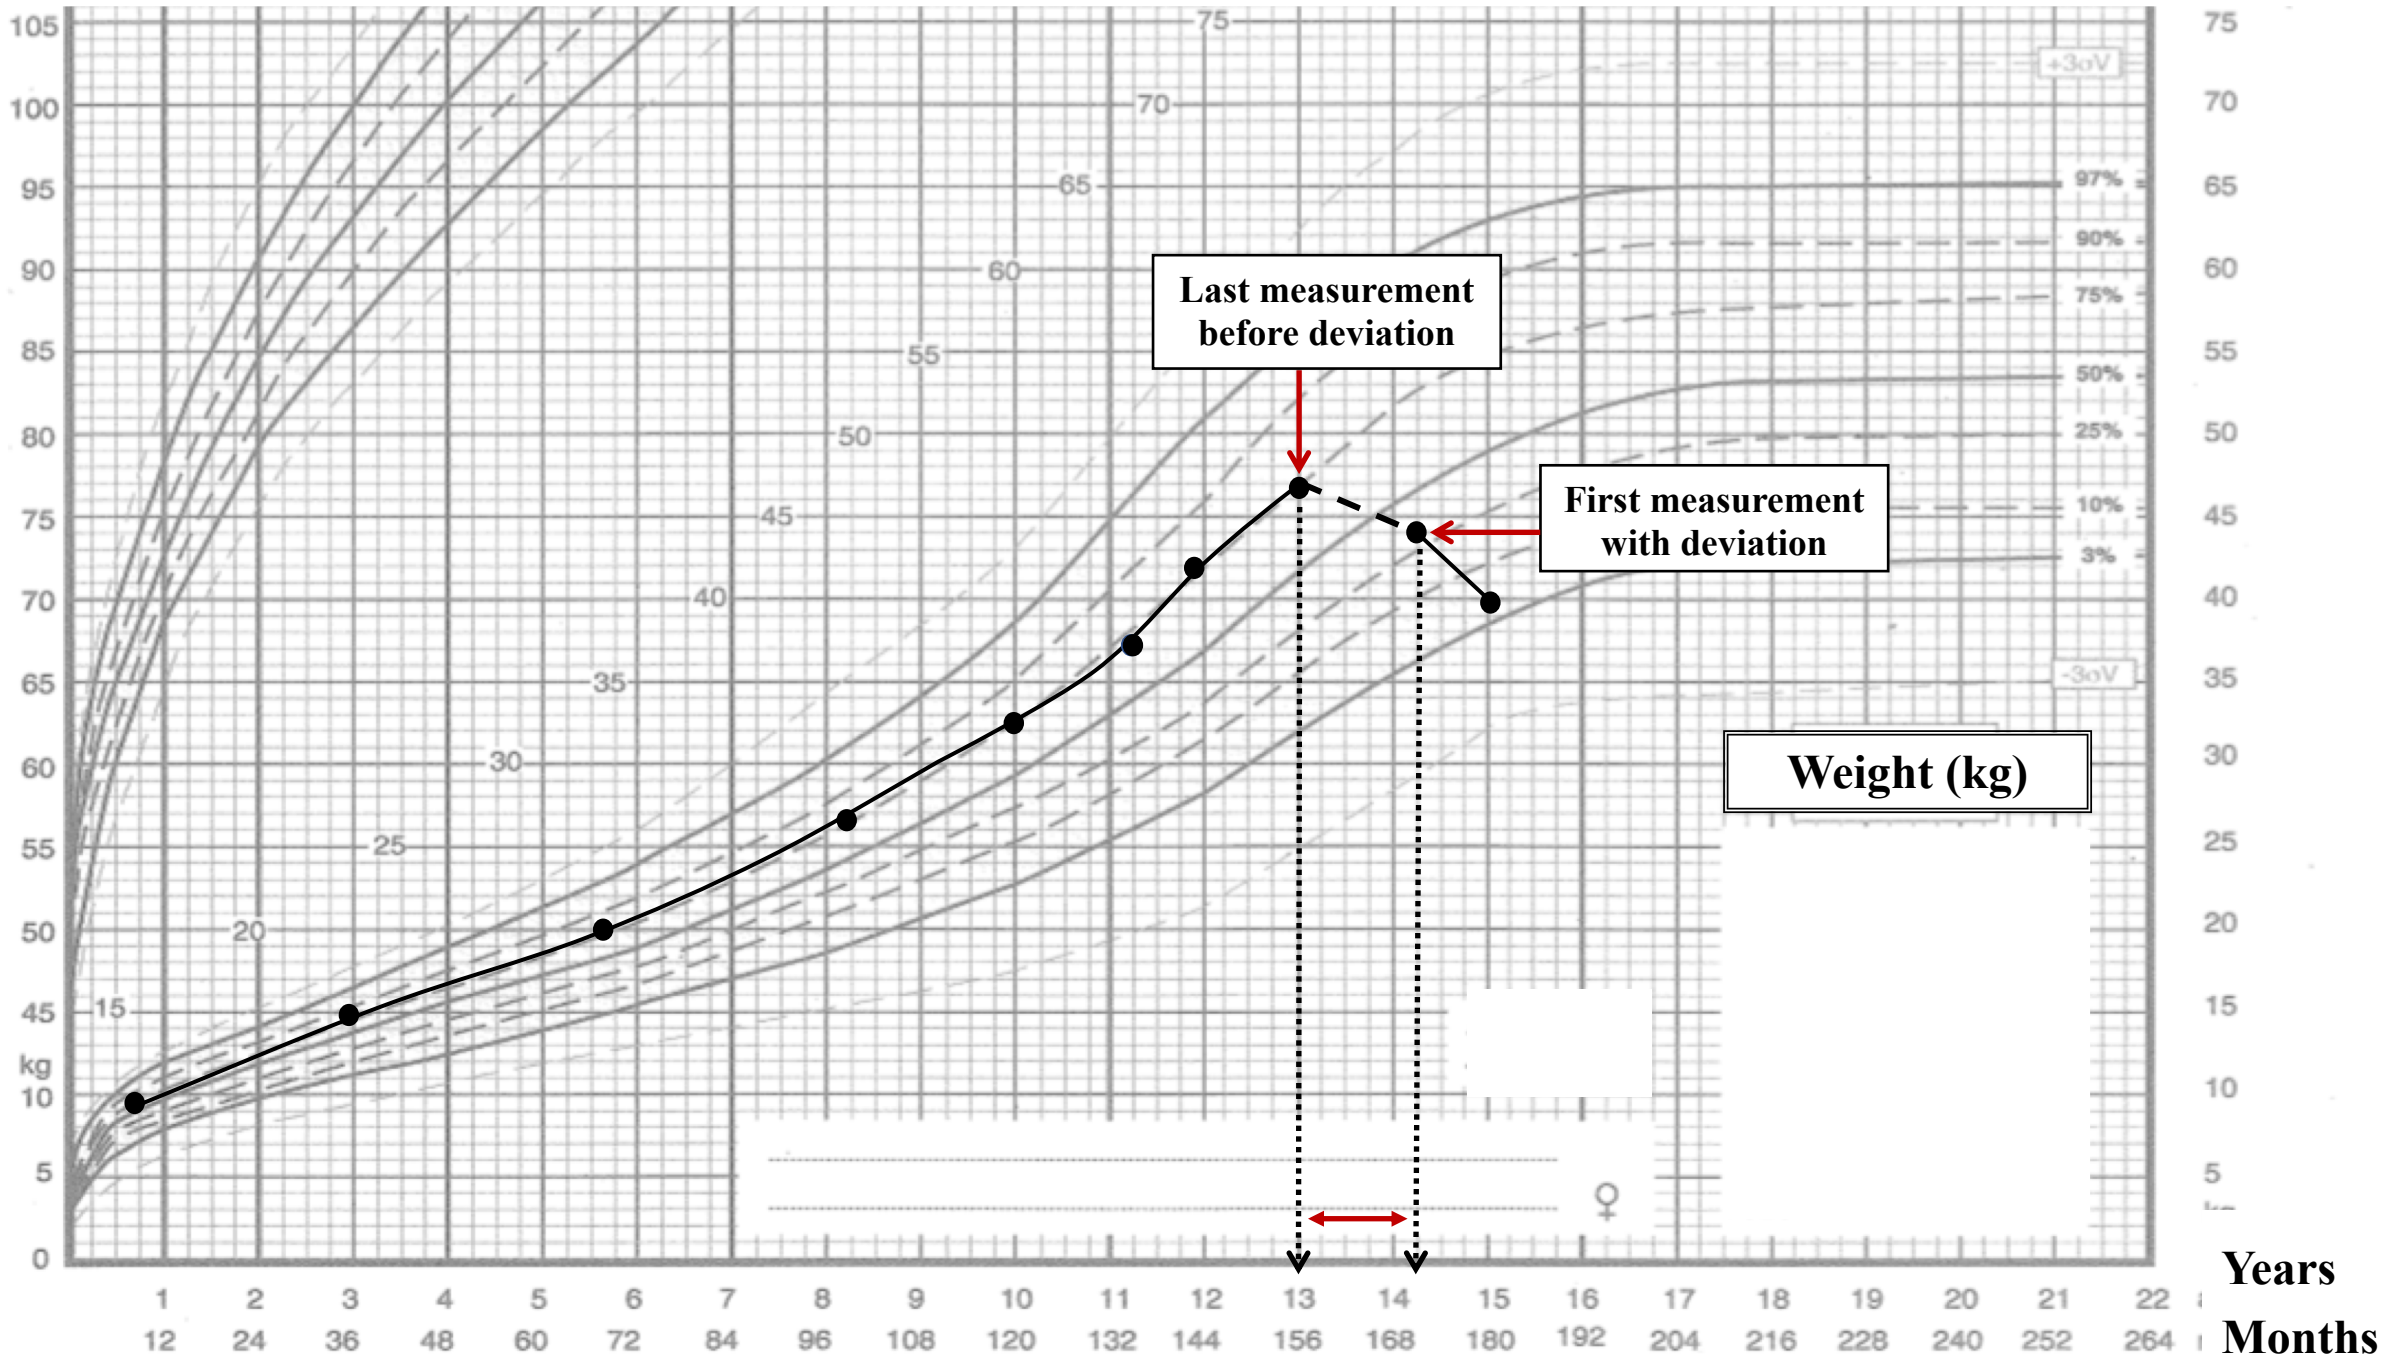

Supplement: 40337_2020_321_MOESM1_ESM.pdf [file 40337_2020_321_MOESM1_ESM.pdf]
